# Supplementary material
Source: publisher figshare collection journal article supplement (https://sage.figshare.com/ndownloader/files/22810274)
Supplement: Supplementary file 1 [file 22810274]

| Internal Patient Satisfaction Questionnaire (IPSQ) - Core Questions                       |                                                                                                                                                                                       |
|-------------------------------------------------------------------------------------------|---------------------------------------------------------------------------------------------------------------------------------------------------------------------------------------|
| <b>SCHEDULING</b>                                                                         |                                                                                                                                                                                       |
| Ease of scheduling your appointment                                                       | 5 <input type="checkbox"/> Excellent<br>4 <input type="checkbox"/> Very Good<br>3 <input type="checkbox"/> Good<br>2 <input type="checkbox"/> Fair<br>1 <input type="checkbox"/> Poor |
| Friendliness and warmth of the person who scheduled your appointment                      |                                                                                                                                                                                       |
| Overall service you received from the scheduling staff                                    |                                                                                                                                                                                       |
| <b>FRONT DESK</b>                                                                         |                                                                                                                                                                                       |
| Greeting you received from the front desk staff when you arrived for your appointment     | 5 <input type="checkbox"/> Excellent<br>4 <input type="checkbox"/> Very Good<br>3 <input type="checkbox"/> Good<br>2 <input type="checkbox"/> Fair<br>1 <input type="checkbox"/> Poor |
| Friendliness and warmth of the front desk staff                                           |                                                                                                                                                                                       |
| Ease of registration process                                                              |                                                                                                                                                                                       |
| Appearance of the front desk staff                                                        |                                                                                                                                                                                       |
| Professionalism of the front desk staff                                                   |                                                                                                                                                                                       |
| Overall service you received from the front desk staff                                    |                                                                                                                                                                                       |
| <b>NURSES &amp; MEDICAL ASSISTANTS</b>                                                    |                                                                                                                                                                                       |
| Greeting you received from the nurse or medical assistant escorting you to your exam room | 5 <input type="checkbox"/> Excellent<br>4 <input type="checkbox"/> Very Good<br>3 <input type="checkbox"/> Good<br>2 <input type="checkbox"/> Fair<br>1 <input type="checkbox"/> Poor |
| Friendliness and warmth of the nurse or medical assistant                                 |                                                                                                                                                                                       |
| Professionalism of the nurse or medical assistant                                         |                                                                                                                                                                                       |
| Appearance of the nurse or medical assistant                                              |                                                                                                                                                                                       |
| Overall service you received from the nurse or medical assistant                          |                                                                                                                                                                                       |
| <b>PHYSICIANS</b>                                                                         |                                                                                                                                                                                       |
| Greeting you received from your physician                                                 | 5 <input type="checkbox"/> Excellent<br>4 <input type="checkbox"/> Very Good<br>3 <input type="checkbox"/> Good<br>2 <input type="checkbox"/> Fair<br>1 <input type="checkbox"/> Poor |
| Friendliness and warmth of your physician                                                 |                                                                                                                                                                                       |
| Appearance of your physician                                                              |                                                                                                                                                                                       |
| Professionalism of your physician                                                         |                                                                                                                                                                                       |
| Overall service you received from your physician*                                         |                                                                                                                                                                                       |
| <b>GENERAL QUESTIONS</b>                                                                  |                                                                                                                                                                                       |
| Overall service you received from [this institution]                                      | 5 <input type="checkbox"/> Excellent<br>4 <input type="checkbox"/> Very Good<br>3 <input type="checkbox"/> Good<br>2 <input type="checkbox"/> Fair<br>1 <input type="checkbox"/> Poor |

| Internal Patient Satisfaction Questionnaire (IPSQ) - Core Questions (cont.)                    |                                                                                                                                                                                                                     |
|------------------------------------------------------------------------------------------------|---------------------------------------------------------------------------------------------------------------------------------------------------------------------------------------------------------------------|
| GENERAL QUESTIONS (cont.)                                                                      |                                                                                                                                                                                                                     |
| General Comments (1)**                                                                         | <i>Free-from text</i>                                                                                                                                                                                               |
| I feel that my physician cares about me                                                        | <input type="checkbox"/> Yes<br><input type="checkbox"/> No                                                                                                                                                         |
| Please finish the following sentence:<br>I feel like my physician cares about me because...    | <i>Free-from text</i>                                                                                                                                                                                               |
| [This institution] makes me feel like a welcomed guest through my entire visit                 | <input type="checkbox"/> Strongly Agree<br><input type="checkbox"/> Agree<br><input type="checkbox"/> Neither Agree nor Disagree<br><input type="checkbox"/> Disagree<br><input type="checkbox"/> Strongly Disagree |
| [This institution] makes me feel as though I am important through my entire visit              |                                                                                                                                                                                                                     |
| Based on my experience I would recommend [this institution] to my family friends and coworkers |                                                                                                                                                                                                                     |
| I received exceptional service at [this institution].                                          |                                                                                                                                                                                                                     |
| Please rate your overall level of satisfaction.                                                | <input type="checkbox"/> Excellent<br><input type="checkbox"/> Very Good<br><input type="checkbox"/> Good<br><input type="checkbox"/> Fair<br><input type="checkbox"/> Poor                                         |
| General Comments (2)**                                                                         | <i>Free-from text</i>                                                                                                                                                                                               |

\*This question was used for statistical analysis of percent top-box scores and physician rank.

\*\*These two questions were qualitatively analyzed for positive versus negative comments and root-cause.
